# Supplementary material
Source: PubMed Central journal article supplement (PMC3309189)
Supplement: mmc1.pdf [file mmc1.pdf]

The American Journal of Human Genetics, Volume 90  
Supplemental Data

## **Exome Sequencing Reveals Mutations in *TRPV3***

### **as a Cause of Olmsted Syndrome**

Zhimiao Lin, Quan Chen, Mingyang Lee, Xu Cao, Jie Zhang, Donglai Ma, Long Chen, Xiaoping Hu, Huijun Wang, Xiaowen Wang, Peng Zhang, Xuanzhu Liu, Liping Guan, Yiquan Tang, Haizhen Yang, Ping Tu, Dingfang Bu, Xuejun Zhu, KeWei Wang, Ruoyu Li, and Yong Yang

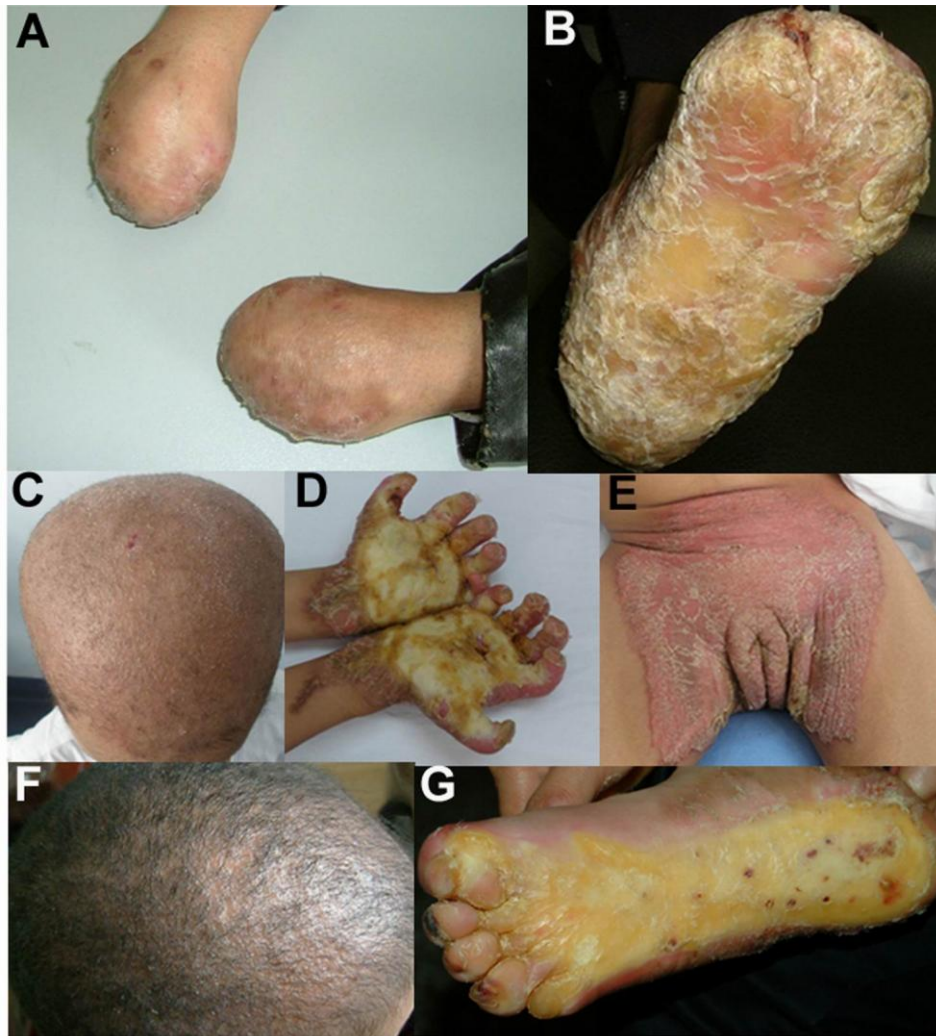

Figure S1. Clinical Manifestations of the Individuals with OS

(A, B) Spontaneous amputation of all digits in individual 3 due to palmoplantar keratoderma. (C-E) Alopecia, palmar and perineal keratosis in individual 4, note the follicular keratotic papules and the flexion deformities of digits with constricting bands. (F) Sparse, short hair, instead of total alopecia, on the scalp of individual 5, a 23-year-old male carrying p.Trp692Gly. (G) Sharply demarcated yellow keratotic plaque on the foot of individual 6.

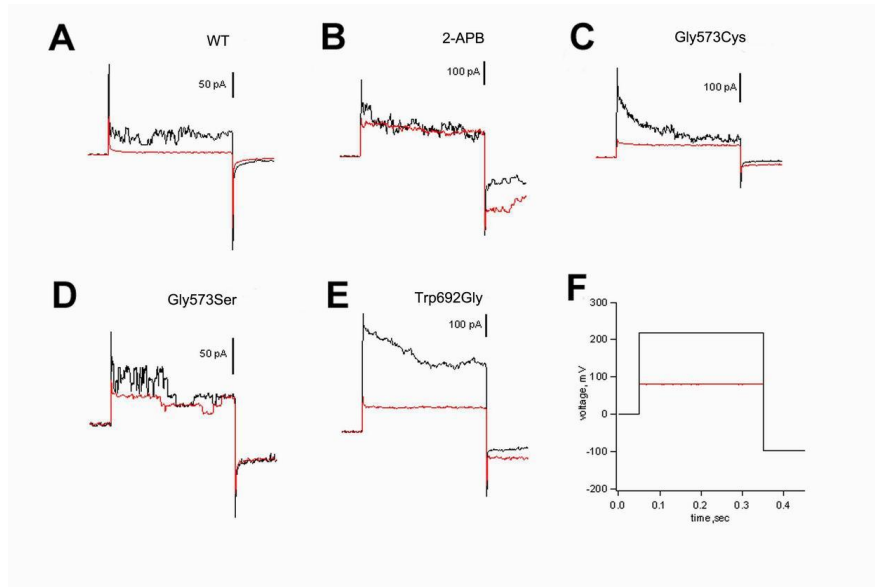

Figure S2. Fast Inactivation of Mutant Channels at a Depolarization Potential

Representative traces of channel activity in inside-out patches expressing WT TRPV3 in the absence (A) or presence (B) of 300  $\mu$ M 2-APB and mutant channels under control conditions (C-E) evoked by the voltage pulse (+220 mV, black; +80 mV, red) (F).

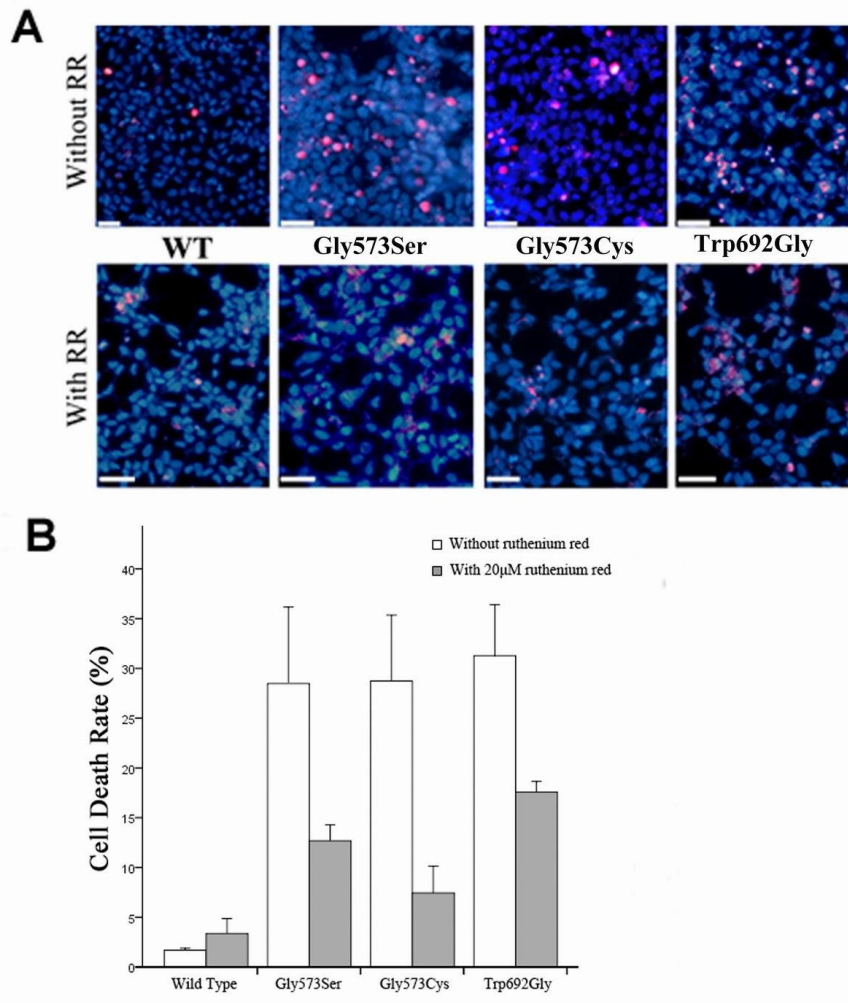

Figure S3. Cell Death Rescued by Ruthenium Red (RR) in WT and TRPV3

#### Mutant-Transfected HEK293 Cells

(A) Merged images of WT and TRPV3 mutant-transfected HEK293 cells stained with PI (red) and Hoechst 33342 (blue). Complete medium with or without 20  $\mu$ M RR was added after 4 hours of transfection. Twenty hours later, transfected HEK293 cells were stained by PI and Hoechst 33342 for 15 minutes before assessment of morphological cell death. Cells transfected with mutant TRPV3 cultured with RR (lower panels) show fewer PI positive cells as compared to the ones without RR (upper panels). (B) Cell death rates (red nuclei / blue nuclei  $\times$  100%) in transfected HEK293 cells with (filled bars) or without RR (open bars). Data were analyzed by

one-way analysis of variance (ANOVA). Tamhane's post hoc test was used to evaluate the differences between groups treated with RR and without RR. Cell death shows a tendency to be partly rescued by RR in mutant groups, although no significant differences were obtained ( $P > 0.0125$ ). Data are the average from three independent experiments. Error bars represent s.e.m.

Table S1. Exome Sequencing Data and the Filtration Procedure of Individual 1 and Her Parents

| <b>Individual</b>                        | <b>OM-1 (individual 1)</b> | <b>OM-11 (father)</b> | <b>OM-12 (mother)</b> |
|------------------------------------------|----------------------------|-----------------------|-----------------------|
| Raw data yield (Mb)                      | 3,786.00                   | 3,775.00              | 2,452.00              |
| Data mapped to target region (Mb)        | 1,770.09                   | 1,575.44              | 1,098.73              |
| Mean depth of target region              | 47.03                      | 31.36                 | 21.87                 |
| Coverage of target region                | 97.69%                     | 98.94%                | 98.37%                |
| Fraction of target covered $\geq 10X$    | 84.06%                     | 82.57%                | 72.19%                |
| Capture specificity                      | 71.90%                     | 63.06%                | 66.47%                |
| Read coverage of CCDS <sup>a</sup> exons | 197,922                    | 200,220               | 199,440               |
| Read coverage of CCDS genes              | 17,154                     | 17,268                | 17,233                |
| Total number of SNVs <sup>b</sup>        | 56,409                     | 70,568                | 60,904                |
| SNVs in exons                            | 19,593                     | 29,173                | 26,940                |

| <b>SNVs data filtration</b> | <b>Filtration methods</b>                                                            | <b>SNVs number</b> |
|-----------------------------|--------------------------------------------------------------------------------------|--------------------|
| Step 1                      | De novo SNVs and not in the 1000 Genomes Project, the dbSNP131, or HapMap8 databases | 239                |
| Step 2                      | Step 1 data predicted damaging by SIFT software                                      | 45                 |
| Step 3                      | Step 2 data with Sanger sequencing validation                                        | 1 ( <i>TRPV3</i> ) |

<sup>a</sup>Consensus coding sequence

<sup>b</sup>Single nucleotide variation

Table S2. Primers for Mutation Screening of *TRPV3*

| <b>Primer</b> | <b>Sense primer (5'→3')</b> | <b>Antisense primer (5'→3')</b> |
|---------------|-----------------------------|---------------------------------|
| Exon1         | ATCATTCCCATTTCCTAGTTGG      | CAGACATGGCCCAGAGGA              |
| Exon 2        | GGCCCCTAAACTCCCTGAAG        | ACTCGTGCCCCTCACAGT              |
| Exon 3        | GAGCTGGCCAGGGTGTGT          | CTCCTCCCTCCTCCCAGACT            |
| Exon 4        | GACTTGCCCTGGGTACGGG         | TTCCTGCAGGGCCCCGGAT             |
| Exon 5        | CGGGGAAAAGGAGAGATTGA        | GAAAATGGGCACCAGAAGC             |
| Exon 6        | GCAGCAACCACACCCTCT          | CTACATGCTTGGGGCTCCT             |
| Exon 7        | TAATCGAGATTGCGTCTTGG        | CTGTTTCCCCCTCCCTTC              |
| Exon 8        | AGAGGGCTAGGGAACCTGAG        | GGTGGCAGCTGTACCTCCT             |
| Exon 9        | GCAGGTCTCCACCCATTCT         | CTGGCAGCACTGGGTCTT              |
| Exon 10       | CCGCAGGCCTTTAGAAAAC         | AGCTCCAAGCCCCCAG                |
| Exon 11       | CCTGGGTTTTGGTCCCTCTA        | GAAACGCCTCCCCAGAAC              |
| Exon 12       | GAGTCTTGGTCTGGGGAAG         | TTTGTTCAGAGGCGGACAC             |
| Exon 13       | CGTGATTCTGGTCTCTCAGC        | CCTTGGTAAACCCCTCTTCC            |
| Exon 14       | AGTGGCCCAAGTGAAGAGAC        | CATGCACTTTGCCATTTTGA            |
| Exon 15       | CCTGATGAGGCTTTGAGAGG        | CAATGACCACGTGCTGAACT            |
| Exon 16       | GGTGGAGTGGGCTCCCCGAC        | GGGAGCCGCTGTTGGCAGTC            |
| Exon 17       | AGACAGAAGGGGAGCTGTGT        | CTGCCCAAGGTTACATGGTC            |
| Exon 18       | GCGTAGCCCTAAGCCATAGA        | GACTCCACCATCCCTCAAAG            |

Table S3. Primers for Site-Directed Mutagenesis of *TRPV3*

| <b>mutation</b> | <b>Sense primer (5'-&gt;3')</b> | <b>Antisense primer (5'-&gt;3')</b> |
|-----------------|---------------------------------|-------------------------------------|
| G573S           | CGGGGTTTCCAGTCCATGAGCATGTACAGC  | TCATGGACTGGAAACCCCGCGTATAGTAGA      |
| G573C           | CGGGGTTTCCAGTCCATGTGCATGTACAGC  | ACATGGACTGGAAACCCCGCGTATAGTAGA      |
| W692G           | GAGAGCGAACGCATCGGGCGCCTGCA      | CGATGCGTTCGCTCTCCTTGGAGACGTTC       |
